# Supplementary material for: The million mutation project: A new approach to genetics in Caenorhabditis elegans
Source: HighWire-hosted journal article supplement (doi:10.1101/gr.157651.113), 2013-06-25
Supplement: Supplemental_Material.docx [file Supplemental_Material.docx]

**The Million Mutation Project:**

**A New Approach to Genetics in *Caenorhabditis elegans*.**

Owen Thompson1, Mark Edgley2,Pnina Strasbourger1, Stephane Flibotte2,Brent Ewing1, Ryan Adair2, Vinci Au2, Iasha Chaudhry2, Lisa Fernando2, Harald Hutter3, Armelle Kieffer2, Joanne Lau2, Norris Lee2, Angela Miller2, Greta Raymant2, Bin Shen2, Jay Shendure1, Jon Taylor2, Emily H. Turner1, LaDeana W. Hillier1, Donald G. Moerman2*, Robert H. Waterston1*

1Department of Genome Sciences, University of Washington, Seattle, WA, U.S.A.

2Department of Zoology and Michael Smith Laboratories, University of British Columbia, Vancouver, BC, V6T 1Z3 Canada

3Department of Biological Sciences, Simon Fraser University, Burnaby, B.C., Canada

*Co-corresponding authors

**Supplemental Material** containing:

1) Supplemental Methods p. 2-22

2) Supplemental Information p. 23-34

3) Supplemental Figures 1-13 and Legends p. 35-39

4) Supplemental Tables 1-17

5) References for Supplemental Material p. 40

**Supplemental Methods**

**Nematode Culture and Mutagenesis:** Nematodes were grown as previously described ([Brenner 1974](#_ENREF_2)), using VC2010, a subculture of the canonical wild-type strain N2 ([Flibotte et al. 2010](#_ENREF_7)). VC2010 was derived from VC196, itself a subculture of an N2 stock received from the Caenorhabditis Genetics Center (CGC) in 2002. VC196 was established as a mixed population washed from the plate of N2 stock received from the CGC and replated on fresh food, grown up to starvation and frozen for survival. To establish VC2010, four L4 VC196 animals were picked to individual 60mm food plates, grown to starvation, harvested by washing, pooled and frozen for survival. Multiple vials of VC2010 were frozen, and periodically during the mutagenesis phase of this project a fresh vial from the original freeze was thawed and grown up to yield a population for mutagenesis.

Worms were prepared for mutagenesis by washing off starved plates with 10-ml aliquots of M9 buffer containing 0.01% Triton X-100, pelleting in a benchtop centrifuge in 15-ml centrifuge tubes, and replating on 150 mm NGM agar plates seeded with *E. coli* strain OP50 or χ1666. After two days at 20° C, gravid adults were harvested by washing with sterile distilled water and the population synchronized by alkaline hypochlorite treatment ([Sulston and Hodgkin 1988](#_ENREF_14)); the egg pellet was plated on fresh 150 mm seeded plates. When the synchronized populations reached late L3 to early L4 stage, they were collected for mutagenesis by washing in M9/Triton X-100.

Four different mutagenesis schemes were used to generate the 2,007 strains described in this work. Mutagenesis with EMS was performed at 25 mM or more commonly at 50 mM according to standard protocols ([Sulston and Hodgkin 1988](#_ENREF_14)). Mutagenesis with trimethylpsoralen/UV (UV/TMP) was performed at TMP concentrations ranging from 2 to 10 ug/ml according to our lab standard protocol (Flibotte et al. 2010). Mutagenesis with N-ethyl-N-nitrosourea (ENU) was performed at 1.0 mM ([De Stasio and Dorman 2001](#_ENREF_5)) Cocktail mutagenesis with a combination of EMS and ENU was performed at two different mixture combinations: half-dose, with EMS at 25 mM and ENU at 0.5 mM; and full-dose, with EMS at 50 mM and ENU at 1.0 mM. For each scheme, mutagenized P0 animals were plated at three animals per 60 mm seeded agar plate, in libraries ranging in size from 200 to 500 plates (Figure 1). The F1 progeny were screened in 1% nicotine ([Moerman and Baillie 1979](#_ENREF_11)) for heterozygous *unc-22* twitchers, and at maximum one such animal was selected from each P0 plate. F2 populations were screened in 1% nicotine to allow selection of homozygous non-*unc-*22 segregants for further processing. Each line was propagated clonally from F2 through F10 to drive other carried mutations to homozygosity, and a single F10 animal was selected from each to establish a strain.

In addition to the mutagenized strains 40 wild isolates were obtained from either the Caenorhabditis Genetics Center or from Dr. Asher Cutter (University of Toronto), representing populations from across the world (Suppl. Table 10).

**Growth, harvesting and DNA preparation for sequencing**: Worm strains for sequencing and CGH analysis were grown on 150mm Petri plates containing rich NGM medium (standard recipe but 8X peptone) with agarose (Invitrogen UltraPure, catalog number 16500-500) substituted for agar, seeded with *E. coli* χ 1666. Populations were grown to starvation and harvested by washing with sterile M9/Triton X-100, then pelleted by centrifugation in sterile 15-ml centrifuge tubes and the supernatant was removed by aspiration. The pellet was washed with sterile distilled water followed by centrifugation and aspiration, using up to two cycles; after the final wash, water was removed leaving a concentrated worm pellet in a minimum volume, typically between 300 and 500 ul. Worm pellets were frozen at -80° C.

Genomic DNA was isolated from thawed worm pellets using the PureGene Genomic DNA Tissue Kit (Qiagen catalog number 158622), following a supplementary Qiagen protocol for nematodes. DNA concentrations were determined using a Thermo Fisher Nanodrop spectrophotometer and quality was checked by electrophoresis on 1% agarose gels prior to processing for sequencing.

**Library preparation and sequencing:** A modified version of the Illumina sequencing library preparation protocol was used. Specifically, 3ug of genomic DNA in 85ul of 1x TE buffer (determined by BR Qubit assay, Invitrogen) was placed in a 100µl microTube (Covaris, Woburn, Massachusetts, USA). Sonication was performed by Covaris (E-series, Covaris) and programmed to yield fragments in the range of 200-400 bp with the following settings: duty cycle – 5%, intensity – 4, cycles/burst – 200, and time – 360s.

Sheared DNA was end-repaired using the NEBNext end repair module (New England BioLabs, Ipswich, Massachusetts, USA). The product was purified with 1x Agencourt AMPure XP beads (Beckman Coulter Genomics, Danvers, Massachusetts, USA) with one modification – beads remained in reaction for future purification steps. The DNA products were incubated with 0.4mM dATP, 10mM MgCl2, and AmpliTaq DNA Polymerase kit (Life Technologies, Carlsbad, California, USA) to generate 3' adenine overhangs. The reaction products were purified with the beads already in the reaction with the addition of 1x reaction volume of binding buffer (20% PEG 8000, 2.5M NaCl). This was followed by ligation of pre-annealed genomic DNA Illumina adapters, which contain 5' thymine overhangs. The product was purified with 1x binding buffer, and solution removed from beads. The adapter-ligated products were PCR-amplified with Kapa Hifi DNA Polymerase (Kapa Biosystems, Woburn, Massachusetts, USA) using Illumina's paired end genomic DNA primer 1.0 and an 8bp bar-code-containing modified PE primer 2.0 (5'-CAAGCAGAAGACGGCATACGAGAT**xxxxxxxx**CGGTCTCGGCATTCCTGCTGAACCG). PCR products were size-fractionated on 6% polyacrylamide gels, and the 300 to 400 bp fractions excised. DNA was extracted from gel-fraction by diffusion; placed in 200ul 1x TE at 65C for 2 hours, followed by gel filtration (NanoSep, Pall Life Sciences, Ann Arbor, MI, USA) and purification with 0.9x Agencourt AMPure beads according to manufacturer's protocol. DNA was quality assessed and quantified using Agilent HS series assay and dsDNA HS Qubit assay. Cluster generation and sequencing was performed on the Illumina cBOT station and sequencing done on Illumina GAII (before April 2011) and HiSeq (starting April 2011) following manufacturer's instructions. Sequences were extracted from the resulting image files using manufacturer software applications run with default parameters. Raw sequencing data from all 2,007 mutant strains and 40 wild isolates are available from the NCBI Short Read Archive (<http://www.ncbi.nlm.nih.gov/sra>) under accession SRP018046.

Although we took precautions at every step of the pipeline to ensure that the sequences came from the frozen stocks of the same name, some mix-ups may nonetheless have occurred in such a large project with so many steps. We checked for mix-ups in various ways and currently estimate these involve less than 1% of strains (see Suppl. material for details).

**Data Processing and Sequence Alignment:** Sequences passing the Illumina quality filter were converted to fastq format and demultiplexed using a custom Perl script, allowing a single base change with respect to the known barcodes used in each lane. Over the course of the project we generated 3,187 Gb of alignable paired-end sequence (in 87 HiSeq lanes and 229 GAII lanes) and 141 Gb of alignable single-end sequence (in 10 HiSeq lanes and 32 GAII lanes), resulting in more than 30,000x coverage of the *C. elegans* genome.

Reads were mapped to build WS230 of the WormBase reference genome (www.wormbase.org) using two different alignment programs: BWA version 0.5.9 ([Li and Durbin 2009](#_ENREF_8)), and phaster, which is distributed as part of next_phred version 1.111216 (Phil Green, personal communication). BWA alignments were performed with default parameters. For phaster alignments, all fastq sequence files were converted to calf format (using next_phred calf tools and -split_type:0), and were aligned with default parameters, with the exception of allowing 300bp insertion/deletion events (using -max_del:300 and -max_ins:300).

**Single Nucleotide Variant Calling:** For both phaster and BWA output, the alignment bam files were sorted and merged using SAMtools version 0.1.18 ([Li et al. 2009](#_ENREF_10)), and putative PCR/optical duplicates were removed using SAMtools rmdup. We then used the SAMtools suite (mpileup, bcftools, vcfutils.pl) to make genotype calls in bcf format, disabling both indel calling and the BAQ computation (base alignment quality), without skipping anomalous read pairs, and using minimum alignment quality 0 and minimum base quality 10. These thresholds are relatively low due to the fact that all our mutagenized strains derive from the same parental N2 line: this allows variants with low quality scores to be screened against the backdrop of all other strains at that site, and enables the recovery of what might otherwise be false negatives. Since all our mutagenized strains were self-crossed for ten generations, we generally restricted our search to homozygous variants using vcfutils.pl (on standard settings), and custom scripts, requiring at least 3x coverage, at least 80% reference disagreement to a consensus variant, and a minimum root mean square mapping quality of 30.

**Eliminating sites yielding false positives:** In the initial analysis of SNVs, we found many more multiply represented sites than expected by chance; also, the fraction of EMS induced GC -> AT alleles was lower than the expected 90%. False positive calls were a likely source of these problems. Differences between the parent VC2010 and reference sequence were one expected contributor. These were characterized by apparent SNVs in almost every strain (sites where >95% of the base calls across all reads from all strains disagreed with the reference; Suppl. Table 5). A second contributor also became clear: some sites had a background of non-reference high-quality (phred>= 30) base calls ([Ewing et al. 1998](#_ENREF_6)) across all strains that by chance reached our thresholds for SNV calling for individual strains (Suppl. Fig. 3). Sites with low to intermediate levels of non-reference bases could represent regions where the reference contains a sequence that is represented by additional copies in the genome of VC2010 with sequence differences between the copies. Low to intermediate levels of non-reference bases might also arise from closely related sequences in the genome where occasional sequence errors lead to alignment errors. We conservatively chose to eliminate all sites with more than 1% non-reference sequences, which eliminated 111,866 sites (about 0.1%) from consideration, reasoning that at this level, false positives were of greater concern than false negatives (for the list of all sites removed from consideration –“blacklisted” – see Suppl. Table 6). Of these only 6,651 sites actually gave rise to a candidate SNV call that was filtered out by the list, and 1,624 appeared to be of parental origin.

**Detection of insertion deletion (indel) variants using gapped alignments:** We exploited phaster's ability to find gapped alignments in order to identify candidate short (< 200 bps) indels. With the PCR duplicate filtered phaster alignments as input, we ran SAMtools to make mpileup files (mpileup parameters '-A -B -d 10000000') and scanned the resulting files for genomic locations at which the read alignments had gaps. We identified a candidate indel when at least 0.6 of the reads confirmed it and there were at least 3 such reads. In order to increase sensitivity while limiting the number of candidate indels, we also kept a candidate indel when 0.25 to 0.6 of the reads confirmed it and at least 5 reads covered it.

To refine the list of candidate indels, we collected alignments from the mpileup files that overlap the candidate sites, had a mapping quality at least 20, and had a base quality of at least 15 at the indel. To eliminate reads that extended across the gap by a few bases at the beginning or end of the alignment, we identified the read that contained the indel and whose start (or end) lay nearest the indel, and then eliminated reads that started nearer the indel location as uninformative.

With these adjustments, an indel site was accepted when (a) it was overlapped by at least 4 informative alignments within the strain, or 3 alignments when it was in a run of fewer than 3 bases, (b) at least 0.6 of them confirmed the indel within the strain, and (c) the total number of informative alignments across all strains was at least as great as the number of strains analyzed (2007) (this eliminated sites subject to poor coverage). An accepted indel was then classified as mutagen induced if it was supported by 0.1 or less of its informative alignments across all strains and as of parental origin if it was supported by 0.7 or more of its informative alignments across all strains (Supp. Table 8). Those that failed any of the three criteria or fell between 0.1 and 0.7 of the informative alignments were unclassified (Supp. Table 9). This gave us 24,770 distinct induced indels, 1,784 distinct parent strain indels, and 28,206 distinct unclassified indels. Sites with intermediate levels of read support presumably reflected problems with alignment, leading to fluctuating results within individual strains, collapse of repeats within the reference or events that had occurred in the propagation of the parent stock and were thus not mutagen induced.

In the final filtering step, classified indels were marked as passed if the covering informative reads had an RMS mapping quality of at least 40, at least 0.4 of the covering reads were informative, and at least 0.8 of the informative reads confirmed the indel. Because this is a conservative filter, some genuine indels may have been removed; those candidate indels that remained unclassified remain available for review (Suppl. Table 9).

We processed the wild-isolate strain short indels similarly, but we analyzed each strain independently because events could be shared between isolates by shared ancestry, keeping only the indels that passed the final filtering steps and were classified as belonging to the parent strain.

**Detection of indels using split reads:** The alignment algorithm phaster (P. Green, personal communication) “soft” clips reads it can no longer extend, generating a SAM format CIGAR code ([Li et al. 2009](#_ENREF_10)) (matching either ^[0-9]+S[0-9]+M or [0-9]+M[0-9]+S$. It then attempts to nucleate a second alignment within the clipped sequence, often resulting in a second “soft” clipped alignment. These “split” reads can result from deletions, insertions or other rearrangements in the mutant strain relative to the reference (illustrated in Suppl. Fig. 11). They may also result from regions with a high density of sequence differences, a feature we observed rarely in the mutant lines but frequently in the wild isolates.

To distinguish among the various events we used the orientation of the split reads relative to one another and where possible to the mate pair. The two parts of a split read (or “mates”) spanning a deletion (or region of dense variation) are expected to maintain their order and orientation across the breakpoint on the same chromosome; tandem duplications result in mates that maintain the expected strandedness (orientation) but with an inverted order; inversions maintain the order but reverse the orientation of the mates (Suppl. Fig. 11). Translocations result in mates on different chromosomes.

Because of alignment ambiguities and more complicated events where a deletion is accompanied by a short insertion, the sum of the aligned bases do not always equal the expected read length. An alignment length less than the expected read length indicates an insertion, whereas an alignment length greater than the read length indicates the use of the same bases from the read in the two alignments and a small duplication relative to the reference.

Using this framework we catalogued all the split reads by their breakpoints, their order, and their orientation for each strain. We also noted all soft clipped (non-spanning) reads, removing possible PCR or optical duplicates (the rmdup feature of SAMtools does not effectively recognize duplicate split reads). Each strain had a relatively large number of unique spanning alignments, mostly between chromosomes, presumably representing ligation events during library preparation.

We inferred true genomic events as follows:

1. Found breakpoints with two or more supporting reads, demanding that a plurality of their mates agree and that they have consistent alignment lengths. Reads from breakpoints bordering a repeated region often had mates that aligned to different copies of the repeat.
2. Assigned the breakpoint mates as a translocation if the mates fell on different chromosomes.
3. Assigned the breakpoint mates as inversion, duplication or deletion based on the order and orientation of the mates, demanding that 80% of the mates support the conclusion.
4. Excluded breakpoints that were detected in 20 or more strains.
5. Documented additional supporting alignments, including soft clipped reads supporting either breakpoint and traditionally defined “discordant” read pairs ([Alkan et al. 2011](#_ENREF_1)).

Inspection of the small indels determined in this way indicated that some represented regions of high SNV density, with inserted sequences equal or within x bases of the deleted sequences. These were particularly prevalent in the wild isolates (26,479 unique events) but some were also observed in the mutant strains (153 unique events). Because these spanned a continuum of events where just a few bases appeared to be substituted to substantially different sequence replacing the deleted sequence, we have simply included these among indel events for counting purposes. Those where the length of the non-reference sequence was greater than the reference were classified as insertions; the remainder were classified as deletions. Importantly, we have used the full, altered sequence for interpreting the effects of the changes.

In addition to their effects on read alignments, deletions and duplications should alter coverage depth, with homozygous deletions having close to no coverage (end effects and occasional misaligned reads from repeated sequences can contribute some apparent coverage) and duplications increasing it by 50% or more. To make this analysis more robust to fluctuations in coverage across the genome, we determined the coverage of every strain at every base from the average across a 100 base window centered on the base and then normalized to 15x average coverage. From the distribution of coverage across the 2,007 strains we calculated the median windowed/normalized coverage as well as the 10th (lower quantile) and 90th percentiles (upper quantile).

For deletions >=100 bases we demanded that the raw normalized coverage was less than 2x and more than one quantile less than the median normalized coverage. For deletions <100 we allowed raw normalized coverage up to 4x, provided there were four or more supporting alignments. For duplications we required that average normalized coverage across the region to be more than two quantiles higher than the median normalized coverage across all strains. The power of this supporting coverage information allowed us to decrease the required support for large deletions and duplications to only two spanning reads, where every other event required at least four unique spanning reads. Some variants having exceptionally high numbers of supporting reads but with below threshold changes in coverage were also observed, such as the mitochondrial indels (see Figure 7; see Suppl. Table 13 for full list).

**Large insertion/duplication-deletion variants:** Our basic strategy was to use variation in read coverage to detect large insertions/duplications and deletions (CNVs) as has been done in other studies ([Alkan et al. 2011](#_ENREF_1)). We began by counting proper read pair alignments in 10 kb bins, shifted 1 kb along each chromosome, using the phaster aligned reads with any PCR or optical duplicates removed by SAMtools rmdup. These read pair alignments were identified by the 'proper pair' FLAG bit set in the SAM output file; additionally we required that the apparent insert length be at least one read length and no more than 10 kb. The apparent insert center was used as the read pair location. Inspection of these results revealed some candidate events but also considerable fluctuation within strains that compromised the ability to recognize variants algorithmically.

Because some of the fluctuation might be region specific we next sought to define the variation in coverage for each bin across all strains. To allow comparison between strains, we normalized the bin counts for each strain using the total number of read pair alignments in the strain. Using these normalized values, for each bin we found the 'global' median and the 1st and 9th decile counts for all 2,007 strains. Based on these values we calculated a preliminary relative quantile deviation (qdev) for each bin of each mutant strain by finding the difference between the strain and global bin medians (µstrain-µglob) divided by either the global 1st or 9th decile counts, depending on whether the difference was less than or greater than zero, respectively. In order to reduce the effect of very uneven read coverage in some strains, we used this preliminary quantile deviation to identify 133 strains with excessive variation (average qdev values => 0.9) and recalculated the global median and decile counts using the 1,874 strains for which this median did not exceed 0.9. These global values for each bin compensated for systematic differences in variation between bins and were used to calculate the final bin qdev values for the mutant and wild-isolate strains.

To identify regions with qdev values that differed markedly from the median, we developed strain-specific thresholds that adjusted for the variation in strain wide qdev values. To determine the relationship between strain wide qdev values and appropriate thresholds we selected 48 strains that had strain-wide medians of the absolute qdev values that covered the range of all strains, which extended from 0.3 to 4.1. For each of these strains we first visually estimated the minimum and maximum threshold qdev values that included essentially all baseline variation. We then plotted the mean of the absolute values of the minimum and maximum baseline qdev thresholds as a function of the medians of the absolute qdev values. The 7 strains with the largest medians were noticeably non-linear and we excluded them from the line fitting. Linear regression of the remaining 41 points gave a slope of 2.84 and y-intercept of 1.75. Because these thresholds graze the baseline noise peaks, to be conservative we increased the y-intercept to 3.0 in order to reduce the number of noise peaks that exceeded the threshold and adjusted maximum and minimum thresholds based on the strain wide median. Thus for a strain with a median qdev of 0.3, the minimum and maximum qdev thresholds were set at 3.85 and for a median qdev of 0.9 the thresholds were set at 5.56.

We used a maximal scoring segment algorithm to find regions of bins with above threshold qdev values (insertions), and regions with below negative threshold qdev values (deletions). The implementation increments the segment score by 6 for above threshold bin qdev values and decrements it by -2 for below threshold bin qdev values. Regions with scores above 1 are reported. The regions were manually reviewed and edited in order to remove marginal regions, merge adjacent regions separated by short gaps, and split regions that contained an opposite sign region. Plots of the coverage of each strain are available at: <https://aspera.gs.washington.edu/aspera/user> with the username waterston-aspera-public and password Asppass1.

**Validation of selected SNVs, indels and CNVs.**

For experimental validation of a sample of SNVs, short indels and long indels detected in this project, we used PCR and Sanger sequencing for smaller events and CGH for larger. For the PCR method, a primer pair was designed to amplify a product between 500 and 800 bp for each feature to be validated, and six 25ul reactions were performed using crude worm lysate as the template. PCR conditions were fairly standard (95 C for 30 seconds, followed by 30 rounds of 95 C melting, 55 C annealing and 72 C extension (each step for 30 seconds)). Amplification products were analyzed on standard agarose gels to confirm product size and quantity, purified using the Qiagen Qiaquick PCR Purification Kit (catalog number 28106), and submitted to the UBC NAPS Unit for Sanger sequencing with both left and right amplification primers. Resulting sequence data was analyzed using WormBase BLAST and dataset WS230.

For the CGH method, worm strains were grown and harvested as described above, and DNA was prepared as for whole-genome sequencing. Genomic DNA was processed according to standard procedures (Maydan et al. 2007), using the N2 wild-type strain VC2010 for reference DNA. High-density three-plex whole-genome microarrays (Roche NimbleGen design name "091013_Cele_RZ_CGH") were manufactured by Roche NimbleGen Inc., and the experiments and subsequent data processing were performed in-house.

**Assigning the variants to features:** The SNVs or heterozygous sites called in each strain were annotated using a custom-made Perl script and annotation information available from WormBase version WS230 both for protein coding genes and non-coding RNAs (microRNA, rRNA, scRNA, snRNA, snoRNA, tRNA and other ncRNA). For variants within coding exons the resulting change in amino acid, if any, was provided in the annotation together with the corresponding Grantham score. Variants within the first two and last two bases of introns were flagged as likely to produce splice defects. Gerp++, phyloP and PhastCons scores were included in the annotation for genomic locations where they were available ([Siepel et al. 2005](#_ENREF_13); [Davydov et al. 2010](#_ENREF_4); [Pollard et al. 2010](#_ENREF_12)). Those conservation scores were calculated using 9 worm species multiple alignments available for download on the UCSC Genome Bioinformatics web site (http://hgdownload-test.cse.ucsc.edu/goldenPath/ce10/multiz9way/).

Similarly, gene features affected by indels were annotated with a custom-made Perl script using the same gene structure data set used to annotate the SNVs. The annotation script identified whether each variation was associated with a frame shift or not. For each deletion affecting a coding exon, the annotation mentioned whether the deletion extended beyond the exon boundaries. For the larger indels the annotation script calculated the fraction of coding bases affected for each gene within the variation.

**Heterozygous sites and regions**: To identify SNVs that were not homozygous, we began by identifying sites with six of more reads in which non-reference bases made up between 20 and 80% of the reads. We removed blacklisted sites and developed criteria (total number of reads, total number disagreeing with the reference) to ensure that the number of disagreeing reads were very unlikely to have arisen by chance. The candidate heterozygous SNVs were assigned to features with their likely effects. Candidate sites within 1Mb were clustered into blocks to identify likely heterozygous regions.

Review of the resultant heterozygous SNV calls revealed 54 strains with calls distributed in large numbers across each of the chromosomes (Suppl. Table 14). Examination of the homozygous SNV calls also showed that an unusually high fraction of the calls had less than 100% agreement. Both results were likely the consequence of small levels of cross-contamination; although the homozygous SNV calls were likely genuine, the sites with intermediate levels of support presumably did not reflect heterozygous events. The remaining 1,953 strains contained 39,640 candidate heterozygous SNVs, of which 24,120 fell in 549 blocks distributed across 453 strains.

**Repeat copy number estimations:** We estimated the copy numbers of the rDNA regions on chromosome I (containing 18S, 5.8S, and 26S subunits) and on chromosome V (containing the 5S subunit) using the number of clusters aligning in each of these regions (Suppl. Fig. 10). To do this, we scanned the pre-duplicate removal merged bam files for each project (the high copy number of these repeats results in an exaggerated removal of reads by rmdup) and determined the number of clusters aligning in each region, as well as the total number of aligned clusters. Copy numbers were then estimated using the formula N=R*G/(L*T), where R is the number of clusters aligning in the region, G is the size of the genome (=100286070bp), L is the size of the repeat unit (=7200bp on ChrI, or 1000bp on ChrV), and T is the total number of aligning clusters in the project.

We estimated the average telomeric size in each strain using a similar method. Reads mapping to any of the 12 reference telomeric regions were summed, provided the mate pair did not align to one of the 12 subtelomeric regions (defined as 500bp inward from each telomeric region). We estimated the number of GCCTAA hexamers per telomere (Suppl. Fig. 9) using the formula H = R*G/(12*6*T), where R is the sum of all telomeric clusters. As a control we estimated the copy number of the combined subtelomeric regions; these varied less than 2-fold from the expected coverage (not shown).

**Detecting strains with variant X chromosome representation:** We compared the expected and measured X chromosome aligned read coverage using the post-PCR duplicate filtered alignment files to count the reads for each strain that align to an autosome and to the X chromosome. Assuming that reads are equally likely to come from any region of the genome, we calculated the expected X coverage by multiplying the number of autosome aligned reads by the fraction of WS230 genome bases that belong to the X chromosome. We calculated the difference between the expected and measured aligned read counts and scaled it by the expected count to get the deviation from the expected count.

**Demonstrating activity of the candidate UGA (opal) nonsense suppressor:** The *gk958112* mutation in strain (VC40543) results in a substitution in the anticodon of an X-linked tRNAArg that should cause insertion of an amino acid at the UGA (opal) stop codon and thereby suppress some opal mutations. We tested *gk958112* for suppression of Unc phenotypes caused by premature opal stops in genes expressed in all cells or in specific tissues including muscle, hypodermis or the nervous system. The genes tested were *unc-16*, *unc-29*, *unc-34*, *unc-40*, *unc-50*, *unc-57*, and *unc-68*. Briefly, N2 males were crossed to VC40543 to generate hemizygous *gk958112* male progeny; these males were crossed to hermaphrodites homozygous for an autosomal *unc* mutation being tested, and non-Unc hermaphrodite cross progeny (all of which must be of genotype *unc/+; gk958112/+*) were placed individually on 60mm agar food plates. From these plates we selected F2 Unc animals, all of which must be homozygous for the *unc* mutation and half of which could be heterozygous for the potential suppressor mutation *gk958112*, and set up two to four 60 mm food plates at five animals per plate. We screened the F3 progeny for animals that were not Unc and were thus potentially homozygous for the *gk958112* suppressor.

We recovered suppressed-Unc progeny from among the F3 only for *unc-29*(*gk856699)* from the strain VC40869. The *unc-29* gene is expressed in muscle and encodes a subunit of the nicotinic acetylcholine receptor {Fleming, 1997 #71}. These presumptive homozygous unc-29(*gk856699); gk958112* animals segregated mostly nearly wild type (suppressed) and also occasional Unc animals, suggesting that suppression was incomplete and variable. To confirm the genotype, we picked three individual suppressed animals and two individual Unc progeny to growth plates, allowed them to self, sampled their progeny with PCR using primers for both the *unc-29* and suppressor alleles, and subjected the products to Sanger sequencing. All of the lines, the three started with suppressed animals and the two with Unc animals, were shown to be homozygous for both *unc-29(gk856699)* and *gk958112* but each continued to segregate segregated mostly suppressed progeny but also occasional Unc progeny, confirming the incomplete and variable suppression.

**Supplemental Information**

**Mutagen activity and specificity**

The number of analyzed strains treated with EMS (25 or 50 mM), ENU (1 mM), a cocktail of EMS and ENU (2 doses) or trimethyl-psoralein is given in Suppl. Table 1 along with the number of events of different types observed in each set. ENU even at 1 mM produced only 70% the number of SNVs per strain as 50 mM EMS (254 SNVs per strain vs 361 SNVs per strain). In turn the combination of EMS and ENU at the higher dose produced 45% more SNVs (525 SNVs per strain) than the higher EMS dose (360 SNVs per strain). 50mM EMS and 1 mM ENU yield similar numbers of small indels per strain but ENU appears to produce about twice as many CNV deletions per strain (0.28) as EMS (0.14). Interestingly, the cocktail yielded no higher numbers of deletions than the more potent of the mutagens alone. TMP at this dose appeared to produce no higher rate of deletions per strain than EMS, but does result in a much lower background of other events.

The spectrum of observed SNVs is in accord with prior reports ([Coulondre and Miller 1977](#_ENREF_3)). EMS yielded predominately (89.9%) GC->AT changes, with AT->TA (4.9%) and AT->GC (2.6%) the next most common events (Suppl. Table 2). This bias targets the protein coding and other GC-rich portions of the genome but has the downside that the amino acid substitutions recovered in protein coding regions are also highly biased. GC->AT transitions are also most common in ENU induced SNVs (44.7%), but AT->GC transitions (21.6%) and AT->TA (20.4%) and AT->CG (11.0%) transversions are also common. The cocktail had intermediate frequencies, but still had 78% GC->AT changes.

The wild isolates showed less biased spectrum, with transitions more common than transversions. We made no attempt to determine the ancestral version, so directionality is defined relative to the N2 reference.

**Sequence results per strain**

The details of the sequence data generated for each of the 2,007 mutant strains and 40 wild isolates are given in Suppl. Table 3. The table provides for each strain the number of reads obtained of different types (length and single or paired end), number aligned, number after duplicate removal, etc. The coverage per strain of aligned reads is also given. Suppl. Figure 1a summarizes the coverage per strain. Most strains had very close to the targeted 15-fold coverage, although 7 strains had between 12-13X coverage and 15 had more than 30X coverage.

Because the wild isolates strains had more extensive alterations to their sequence, we targeted their genomes for 30-fold coverage, with a minimum of 25-fold (Suppl. Fig. 1b).

**Comparison of bwa (0.5.9) and phaster.**

The alignment program phaster (Green, personal communication) provides in its output both gapped reads and split reads for reads spanning insertions and deletions. To ensure that this did not come at the cost of other coverage we compared the total coverage achieved for phaster to bwa, where coverage reflects the overall success of mapping reads. As indicated in Suppl. Table 4, phaster yields a slightly higher fold genome coverage than bwa. Alignment quality scores were also higher with phaster.

**Estimation of false positive and negative rates – SNVs**

**False positives**

We estimated false positive SNVs by comparing the SNVs detected in CB4856 with Sanger-based sequences. Sanger-style Hawaiian genomic reads on a CB4856 stock from the Schedl lab (Tim Schedl, Washington University School of Medicine) were available at the Washington University Genome Center (11,541 reads; 8,220,524 bases; 712 bases average read length; ([Wicks et al. 2001](#_ENREF_16))) and fosmid-end reads at University of British Columbia (30,720 reads; 42,240,745 bases; 1375 bases average read length; Moerman, unpublished).  We aligned these reads against the *C. elegans* N2 reference genome using bwasw ([Li and Durbin 2010](#_ENREF_9)) with default parameters.

To identify SNVs called by the long reads we filtered the bwasw alignments by first retaining alignments with quality >=40 (23,113,853 bases of the *C. elegans* reference with an aligned read). At each base, only those alignments were retained where the base call was of phred quality >=30 (leaving 16,369,063 bases of the *C. elegans* N2 reference genome with an aligned read with a high quality base call).  Of the SNPs identified by the short reads in CB4856 in this project, 25,902 have at least one long read with a high quality alignment and a phred quality base of >=30 at that base.   At 25,658 sites (99.1%) of the long reads agreed with the SNV call identified by our pipeline. In additional, 238 sites one or more reads supported the SNV call, but one or more other reads did not. In only 106 cases (0.4%), our pipeline identified a SNV, but in every case the long read agreed with the reference.

A less direct but useful indicator of false positives was the fraction of GC->AT changes in the EMS treated strains. Prior work indicates that these transitions account for about 90% of induced changes ([Coulondre and Miller 1977](#_ENREF_3)) and thus agree well with our data (89.89% GC->AT ( Suppl. Table 2). Assuming that false positives would not show the same bias, any reduction of the GC->AT fraction would reflect false positives. Methods that selectively removed false positives would increase the fraction.

**False Negatives**

We estimated the false negative rate in two ways. In the first approach we measured the impact of coverage on the false negative rate. Using 10 strains that had between 38 and 79X coverage, we subsampled from these strains to generate 15X coverage and compared the detected SNVs at 15X with those detected at full coverage. We iterated the process 100 times for each strain. The 15X subsamples had on average between 0.6% and 2.9% fewer detected SNVs than full coverage, with an overall average of 1.4%. We conclude that substantially higher coverage would have only marginally increased the detection of SNVs.

In the second approach, we created mutations in the reference using the fakmut function in SAMtools (Li et al., 2009). We created 10 sets of mutated genomes, containing a total of 5,003 simulated SNVs randomly distributed across the reference. We then mapped reads from each of 10 projects against each of the mutated genomes. We detected 46,371 of the simulated SNVs (92.9% sensitivity). Of the simulated SNVs not detected, 2,445/3,659 fell in regions of low coverage in high quality mapping reads, where given current sequencing technology we are simply unable to detect SNVs and another 1,032 fell in regions of <3x coverage.

**Estimation of false positive and negative rates – indels**

Because we used two different methods to find indels with defined end points we checked the results of the two procedures independently.

**False Positives – gapped alignments**

Using the methods defined for indel detection on the mutagenized strains, we identified 45,570 indels between 1 and 108 basepairs in size in CB4856.  We then used our alignments of the Sanger reads against the N2 reference to look at how many of those indels were validated. We identified the 3,212 indels with at least one read with phred quality >=30 (Ewing et al., 1998) aligned at the base of the indel suggested by the short read analysis. For each of those 3,212 positions, we created a Hawaiian-like sequence through each region by retrieving the *C. elegans* N2 reference sequence from the indel position including 1,500 bases on either side and applying the specific insertion or deletion that our short read analysis suggested.  We then aligned the Sanger reads against the database of Hawaiian-like elegans sequences using cross_match (-minscore 22 -vector_bound 0  -max_group_size 0 -discrep_lists -tags).  Of the 3,212 indels, 3,189 (99.2%) were confirmed.  Of those 23 that were not confirmed, 9 also showed an indel in the long reads but of a different number of bases than suggested by the short read data.

We also tested 17 short indel calls in different mutant strains directly by PCR amplification and Sanger sequencing. Most of the selected indels were single-base insertions or deletions, but included in the set were one insertion of six bases and three deletions of five, six and 19 bases. These were spread across all six chromosomes. All 17 were confirmed: in 15 cases both reads confirmed the indel; in two cases only one read was of sufficient quality to provide confirmation.

**False negatives – gapped alignments**

To estimate the fraction of indels that our pipeline may have missed, we again used the Sanger reads from CB4856. The list of bwasw called indels (based on the alignments to the Hawaiian long reads, keeping only bwasw alignments with quality >=40) contained 49,617 possible indels where the phred quality at the position of the indel was >=30.  We introduced those indels into the correct position within the *C. elegans* N2 reference to make a Hawaiian-like *C. elegans* sequence through that region (with 1,500 bases on either side).  We aligned the long reads to these Hawaiian-like sequences using cross_match (-minscore 22 -vector_bound 0  -max_group_size 0 -discrep_lists -tags) and 978 were confirmed by >=2 reads with 24 of those confirmed by >=3 reads. From the 978 confirmed by 2 or more reads, we removed those where there was another long read confirming the reference sequence through the region (<1%), those where our indel pipeline had also called an indel, and those in repetitive regions of the genome (where the 24mer containing that base occurred at least twice in the genome).  At that point 341 indels (252 insertions and 89 deletions ranging in size from 1 to 46 bases with 251 of them a single base, 31 two bases, etc.) remained that were confirmed by at least two reads (of those 22 were confirmed by more than two reads). Of those 341 indels, 45 were in our list of detected but not validated indels. In 27 of the 296 remaining possible indels, there was, based on bwa alignments, at least one short read suggesting a possible indel at the location.

**False Positives – split reads**

Using methods that exploited split reads to detect indels, we obtained a list of 5,375 possible duplication, deletion, replacement (deletion of some sequence and insertion into that spot of a different sequence) and duplication/insertion events (duplication plus insertion of additional sequence) in the CB4856 genome reads. Each event was introduced within the N2 *C. elegans* sequence to create a Hawaiian-like sequence. We then aligned those Hawaiian-like sequences against the Sanger-style set of reads. Of the 5,375 events, there were 1,191 where at least one Sanger-style read spanned the event.  Of those 1,191, there were 1,150 of them (97%) that were “confirmed” by alignment with the long read (when allowing substitution and single base indels) with the totals by type as follows:

| Type | Confirmed | Not confirmed |
| --- | --- | --- |
| deletion | 144 | 1 |
| replacement | 879 | 25 |
| duplication | 62 | 11 |
| duplication/insertion | 65 | 4 |
| Total | 992 | 21 |

The lower rate of confirmation in the duplications stemmed in part from other sequence differences in one of the copies of the duplication that led to alignments that failed to pass thresholds. Loosening parameters improved the rate of confirmation.

**Estimation of false positive rates – CNVs**

To test the CNVs called by our pipeline, we carried out array-CGH experiments on a set of 16 deletions and 35 duplications in 24 strains. For one of the deletions and four of the duplications the array lacked sufficient probes in the region to detect CNVs reliably. 15/15 of the remaining deletions were confirmed unambiguously and 20 of the duplications were confirmed unambiguously and there was support for another 6, yielding 26/31 with support. Of the five that were not supported by CGH results, manual inspection of coverage supports the automated call as does the presence of numerous heterozygous SNV calls under the putative duplicated segments. Further experiments will be required to determine the basis for the inconsistency.

**Regions with low mapping quality**

Given that a large fraction of the false negative calls in the fakmut set fell into regions of low mapping quality (as defined by SAMtools), we examined mapping coverage in more detail. To identify the regions of the genome where variants would not be called because of consistently low mapping quality, we calculated the average mapping quality of the reads covering each base across the genome for all 2,007 strains (Suppl. Fig. 2). About 5% of bases have an average mapping quality of less than 30, making it likely that some strains would not have sufficient coverage of high quality reads to allow the identification of variants. These regions generally represent repeated sequences of various sorts. More than 95% of the genome is covered by reads with an average mapping quality greater than 95.

For regions that are only duplicated or triplicated, possible SNVs could be identified by the presence of intermediate levels of bases disagreeing with the reference. These data would suggest that one of the copies contains a variant, but the data do not reveal which copy. Also, the region on chrV:2.34-2.56 Mb contains a duplication of 108 kb in the reference that is present in only single copy in VC2010 ([Vergara et al. 2009](#_ENREF_15)). Mapping quality would be falsely reported as low here. Altogether we detect 93 SNVs across the 2,007 strains that might thus be true variants in this region in the mutagenized strains.

**Consolidated description of the variants in each strain.**

To facilitate the use of individual strains, we have compiled a complete description of the various types of variants detected in them. We have also provided a graphical view of the copy number variation and the SNV sites, showing the fraction disagreeing with the reference (thus revealing potential heterozygous regions). These lists are available at <https://aspera.gs.washington.edu/aspera/user> with the username “waterston-aspera-public” and password “Asppass1”.

**Checking strain identification**

We looked for mix-ups of the strains during processing in several ways. In one we compared the SNV calls across all 2,007 strains to look for strains that shared most SNVs. We identified 15 pairs of strains for which the sets of called SNVs were nearly identical, indicating potential duplication at some stage of the strain isolation or sequence production pipelines. All 30 strains were recovered from frozen stocks, and genomic DNA was isolated from each and subjected to resequencing to about 0.1-fold coverage. In 11 pairs, the sequence indicated that a single isolate was frozen as strains with two different names. In the remaining four cases, analysis showed that one member of each pair had no representation in the MMP set of strains, indicating a loss of those DNA samples at some step during processing and a duplication of the other strain. For each of the 15 pairs, one strain and its accompanying sequence data were kept for the MMP set.

In a second search for problems we examined all the strains for an unusually high number of sites with apparently heterozygous calls across the genome. Fifty-four such strains were found that also had a reduced representation of SNV calls supported by 100% of the reads. These strains apparently had a low level of DNA contamination and have been noted (Suppl. Table 14).

We have also checked a variety of strains for expected variants. In checking indels, 17/17 strains contained the expected indel as determined by thawing the strains and checking the sequence by PCR and Sanger sequencing. We have also checked nonsense or missense alleles from strains across the collection, sampling different batches and to date, 71/71 have been confirmed.

We have also checked a variety of strains for the predicted phenotype or genotype based on sequence findings and with one notable exception the thawed strains have yielded the expected changes. The exception was a strain that was predicted to contain the potential opal tRNA suppressor mutation. Sanger sequencing revealed that the strain did not contain the expected mutation. Test sequencing of all the other mutant strains in the same day's DNA preparation batch revealed the correct strain, indicating that a mix-up had occurred during production of the original DNA sample or during later processing steps.

Based on these data, we estimate that remaining errors in strain identification occur at 1% or less.

**Supplemental Figures and Legends.**

Supplemental Figure 1. The number of strains with each level of coverage is shown for the 2,007 mutagenized strains (1a) and for the wild isolates (1b). Most strains lie between 13-fold and 17-fold coverage for the mutants, whereas the wild isolates have close to the target 30-fold coverage.

Supplemental Figure 2. The mean mapping quality per base was determined across the 2,007 strains. The fraction of the genome covered at each mapping quality from 0 to 100 is shown in a cumulative plot. About 5% of the genome has a mean mapping quality of <30, the RMS mapping quality threshold for calling SNVs.

Supplemental Figure 3. For each site with a candidate SNV, we calculated the average number of high quality called bases that disagreed with the reference and plotted that against the number of strains showing that candidate SNV. Some 1,624 sites disagreed consistently with the reference (>95%) and were deemed to represent bases where the parental strain had diverged from the reference or where the reference was in error (some of these are only represented in a subset of strains because of low coverage of those sites). Other sites showed a range of nonreference bases (1-95%) and a range of strains containing that candidate SNV. A cluster of candidate SNVs with between 0.4 and 0.6 fraction nonreference bases called in fewer than 100 strains may represent sequences present in two copies in the parent strain, but only represented as unique sequence in the reference.

Supplemental Figure 4. Initially after removing only sites that appeared to result from differences between the parental strain and reference sequence, the number of candidate SNVs that were detected in multiple strains (black bars) greatly exceeded the number expected by chance, assuming a Poisson distribution (connected open circles). After removing all the blacklisted sites, the number of candidates in two or three strains was much closer to the expected (open bars). The number of sites present in 4 or more strains still exceeded expectation. These may represent residual false positives, the emergence of mutations during propagation of the parental strain during the course of the work, or mutational hotspots.

Supplemental Figure 5. To test the impact of depth of coverage on SNV detection, we took a strain with high depth of coverage and randomly subsampled to produce differing levels of coverage (1-78 fold). As indicated by the open green circles/line the number of called SNVs rose quickly with increasing coverage and by 12-fold coverage most SNVs detectable at the highest coverage were already called. The number of candidate SNVs that were removed as parental in origin (blue) or otherwise “blacklisted” is also shown. Interestingly, these continue to increase slightly with increasing coverage, perhaps reflecting the fact that some of these sites involve regions with predominately low coverage in high mapping quality reads.

Supplemental Figure 6. The distribution of the number of strains with different numbers of SNVs is shown for each of the six different mutagenesis protocols.

Supplemental Figure 7. The number of short indels in homopolymer runs and non-runs is plotted for each indel size (for the single base indels the numbers are given, rather than plotted). Most indels are very short (1-2 base) and for these events in runs predominate. For indels of 3 or more bases non-run events are most abundant.

Supplemental Figure 8. The locations of detected CNVs across the 2,007 mutant strains are plotted for each of the six chromosomes, with increases in copy number (blue) shown above the line and decreases (red) below. Each line represents a different event in one or more strains. Both increases and decreases are broadly distributed across the chromosomes, with a tendency for larger number of deletions to occur on chromosome arms, particularly the right arms of IV and V. Several regions have multiple events with slightly different end points, perhaps representing hotspots. Alternatively, these may represent events that have occurred in the propagation of the parent, where the detection algorithm yields slightly different end points.

Supplemental Figure 9. The distribution of conservation scores as measured by PhastCons scores of all genes, those genes with a nonsense mutation in the mutant set and those genes with a nonsense mutation in the wild isolates. Panel (a) shows the result for all regions of the genome. Panels (b) and (c) show the results for genes only on the arms or in the centers of the chromosomes. A much larger fraction of genes with nonsense alleles in the wild isolates show little or no conservation compared to all genes or those with nonsense alleles in the mutant set, whether looking at all regions together or the arms or centers of the chromosomes separately. The genes with nonsense alleles in the mutant set are generally very similar in distribution of conservation scores to all genes, with the exception of the very highly conserved genes.

Supplemental Figure 10. The estimated number of telomere repeat copies (GCCTAA) per chromosome end as estimated by read depth is plotted for the 2,007 mutagenized strains.

Supplemental Figure 11. The estimated number of rDNA repeat copies for the wild isolates is plotted for both the 7.2 kb main repeat on chromosome I (28S, 18S and 5.8S genes; dark bars) and the 1 kb 5S repeat on chromosome V (light bars). Not shown are strains with even higher numbers of the 7.2 kb repeat (267, 268, 279, 298 and 418 copies) and 5S repeat (260, 303 and 339).

Supplemental Figure 12. A graphical representation of the methods used to detect indels using the split alignments generated by phaster. Reads aligning across a deletion of the reference sequence will produce either (a) read pairs with discordant insert sizes (black), (b) multiply aligned “spanning” reads that exactly define deletion breakpoints (yellow and blue, marked by stars) or (c) reads with non-spanning clipped sequence at the deletion site (red, green, turquoise, purple). Deletions, duplications, and inversions each have a distinct split read signature depending on the order and the orientation of the split alignment (upper right). The number of aligning bases from a split read, combined with the total span of the alignments, can further imply deletion or insertion events (bottom right).

Supplemental Figure 13. An interactive web site for obtaining detailed information about the collection is maintained at http://genome.sfu.ca/mmp/search.html. The web site to provides easy querying of the resource and also presents data that is difficult to represent in WormBase (the variants have also been deposited in WormBase). Searches can be carried out for genes or strains, looking for mutations of classes of the user’s choosing. Bulk downloads of the data can be obtained at <https://aspera.gs.washington.edu/aspera/user> with the username waterston-aspera-public and password Asppass1.

**Supplemental Tables**

| Suppl. Table1 | Strain Mutagen Summary |
| --- | --- |
| Suppl. Table 2 | Mutagen Specificity |
| Suppl. Table 3 | Sequencing Statistics |
| Suppl. Table 4 | Alignment Coverage: BWA vs phaster |
| Suppl. Table 5 | Parental SNV Differences vs WS230 |
| Suppl. Table 6 | High Background “Blacklisted” Sites |
| Suppl. Table 7 | Blacklisted Site Annotations |
| Suppl. Table 8 | Parental Small Indels |
| Suppl. Table 9 | Non-parental background indels |
| Suppl. Table 10 | Source of Wild Isolates |
| Suppl. Table 11 | Subsampled Projects and Results |
| Suppl. Table 12 | Annotated variants in each strain |
| Suppl. Table 13 | Heterozygous Blocks |
| Suppl. Table 14 | Mitochondrial Variants |
| Suppl. Table 15 | Strains with more than 15 small indels |
| Suppl. Table 16 | Blacklisted Sites in Each Strain |
| Suppl. Table 17 | Cross Contaminated Strains |

**REFERENCES**

Alkan C, Coe BP, Eichler EE. 2011. Genome structural variation discovery and genotyping. *Nature reviews Genetics* **12**(5): 363-376.

Brenner S. 1974. The genetics of Caenorhabditis elegans. *Genetics* **77**(1): 71-94.

Coulondre C, Miller JH. 1977. Genetic studies of the lac repressor. III. Additional correlation of mutational sites with specific amino acid residues. *Journal of molecular biology* **117**(3): 525-567.

Davydov EV, Goode DL, Sirota M, Cooper GM, Sidow A, Batzoglou S. 2010. Identifying a high fraction of the human genome to be under selective constraint using GERP++. *PLoS computational biology* **6**(12): e1001025.

De Stasio EA, Dorman S. 2001. Optimization of ENU mutagenesis of Caenorhabditis elegans. *Mutation research* **495**(1-2): 81-88.

Ewing B, Hillier L, Wendl MC, Green P. 1998. Base-calling of automated sequencer traces using phred. I. Accuracy assessment. *Genome research* **8**(3): 175-185.

Flibotte S, Edgley ML, Chaudhry I, Taylor J, Neil SE, Rogula A, Zapf R, Hirst M, Butterfield Y, Jones SJ et al. 2010. Whole-genome profiling of mutagenesis in Caenorhabditis elegans. *Genetics* **185**(2): 431-441.

Li H, Durbin R. 2009. Fast and accurate short read alignment with Burrows-Wheeler transform. *Bioinformatics* **25**(14): 1754-1760.

-. 2010. Fast and accurate long-read alignment with Burrows-Wheeler transform. *Bioinformatics* **26**(5): 589-595.

Li H, Handsaker B, Wysoker A, Fennell T, Ruan J, Homer N, Marth G, Abecasis G, Durbin R. 2009. The Sequence Alignment/Map format and SAMtools. *Bioinformatics* **25**(16): 2078-2079.

Moerman DG, Baillie DL. 1979. Genetic Organization in CAENORHABDITIS ELEGANS: Fine-Structure Analysis of the unc-22 Gene. *Genetics* **91**(1): 95-103.

Pollard KS, Hubisz MJ, Rosenbloom KR, Siepel A. 2010. Detection of nonneutral substitution rates on mammalian phylogenies. *Genome research* **20**(1): 110-121.

Siepel A, Bejerano G, Pedersen JS, Hinrichs AS, Hou M, Rosenbloom K, Clawson H, Spieth J, Hillier LW, Richards S et al. 2005. Evolutionarily conserved elements in vertebrate, insect, worm, and yeast genomes. *Genome research* **15**(8): 1034-1050.

Sulston JE, Hodgkin J. 1988. Methods. In *The Nematode Caenorhabditis elegans*, (ed. WB Wood), pp. 587-608. Cold Spring Harbor Laboratory, Cold Spring Harbor, NY.

Vergara IA, Mah AK, Huang JC, Tarailo-Graovac M, Johnsen RC, Baillie DL, Chen N. 2009. Polymorphic segmental duplication in the nematode Caenorhabditis elegans. *BMC genomics* **10**: 329.

Wicks SR, Yeh RT, Gish WR, Waterston RH, Plasterk RH. 2001. Rapid gene mapping in Caenorhabditis elegans using a high density polymorphism map. *Nature genetics* **28**(2): 160-164.
